# Supplementary material for: A method for predicting hydrogen and oxygen isotope distributions across a region's river network using reach-scale environmental attributes
Source: Copernicus journal article supplement (doi:10.5194/hess-26-4933-2022), 2022-10-07
Supplement: Supplementary file 1 [file hess-26-4933-2022-supplement.zip]

# Using NZ River Maps to visualise and download stable isotope data and compare to point measurements

## Visualise stable isotope data

1. Navigate to NZ River Maps at <https://shiny.niwa.co.nz/nzrivermaps/>
2. On the Map options tab, Choose Stable isotopes from the Select variable type dropdown menu

The screenshot shows the 'Map options' tab of the NZ River Maps application. At the top, there are navigation links: 'About', 'Map options' (active), 'Plot flow', 'Download data', and 'Help'. Below these, the '1. Select map view' section explains how to choose which rivers are visible, with options for 'All catchments', 'Whole region', and 'Single catchment'. The '2. Map predictions' section allows users to choose a prediction variable. A 'Select variable type' dropdown menu is open, showing a list of variables: 'River Environment Classification', 'Wetted width', 'Bed sediment cover', 'Sediment load', 'Water quality', 'Stable isotopes' (highlighted in yellow), 'Invertebrate community', and 'Fish presence/absence'. To the right, the 'Select variable' dropdown is set to 'Climate class'. Below this, there is a 'Select colour scale' dropdown set to 'Dark2'. At the bottom, there are checkboxes for 'Create colour bins' and 'Flip colour scale', and an 'Update map' button.

3. Choose the stable isotope variable (e.g.,  $\delta^{18}\text{O}$ ) you want to visualise on the Select variable dropdown menu.
4. Press the Map selected variable button to produce a map that will look something like below.

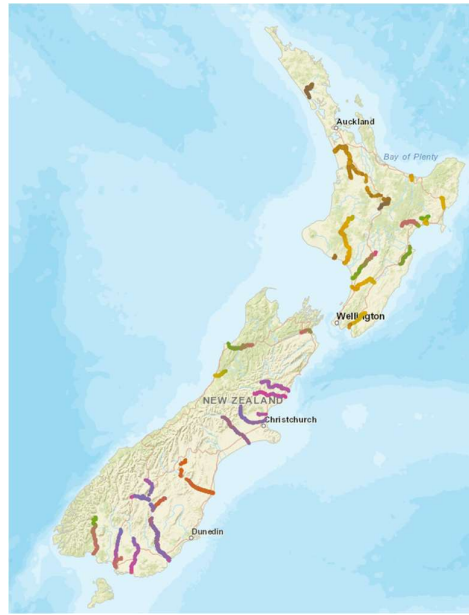

## Altering the map appearance

You can alter the map appearance by zooming into the map, applying transformations to the data or changing the colour scheme using the 3 Alter map appearance options on the Map options tab. Each time you change a setting or zoom level, you need to press the Update map button to visualise the changes on the map. For example, you can set the colour scheme to a yellow-red gradient and zoom in to make a map that looks like the one below.

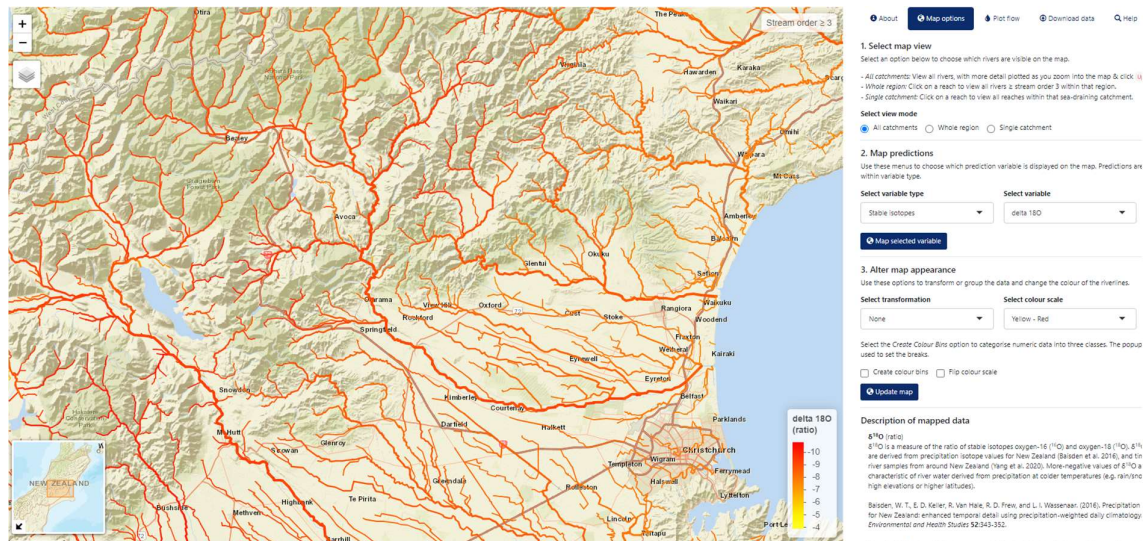

You can also alter the map background by clicking on the icon on the top left of the map.

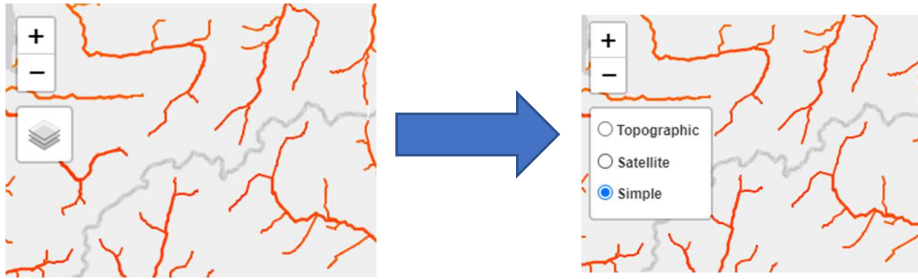

### Selecting the map view

There are three scales to visualise data on the map – all catchments, whole regions or single catchment. These are selected using the [1. Select view mode options](#) on the [Map options](#) tab and are described in more detail below.

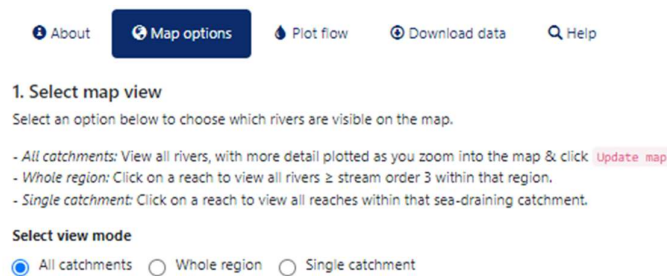

### All catchments

By default, NZ River Maps displays reaches on the digital river network at the national scale, with the level of detail determined by the zoom level. You can change the zoom level by using the +/- buttons in the top left corner of the map or using the scroll wheel on your mouse. Don't forget to press the [Update map](#) button (as described under *Altering the map appearance* above) to update the map. The level of detail is indicated in the top right corner of the map as the stream orders displayed.

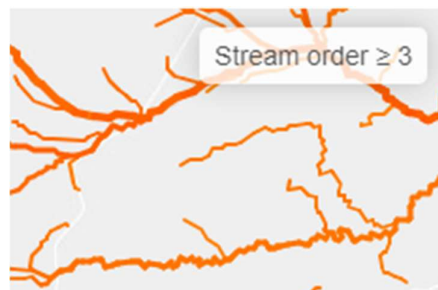

To reset the map view after using the [Whole region](#) or [Single catchment](#) options, you can select the [All catchments](#) option.

### Whole region

The whole region setting is designed to visualise data across one of 15 territorial regions in New Zealand.

1. Navigate to the region that you wish to visualise data for.
2. Select the [Whole region](#) option under the [Select view mode](#) and then click on a reach within your region of interest. Note that you may need to zoom in and [Update map](#) to be able to

view a reach for clicking first. The map will zoom to the scale of the region and map the data. This may take a few seconds as the dataset might be quite large, so please be patient. The level of detail is restricted to Stream order  $\geq$  for most regions to reduce the computational burden for drawing the map.

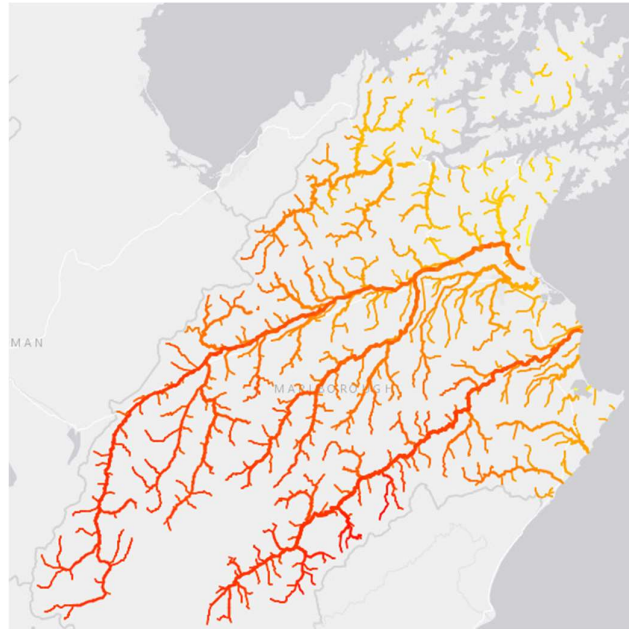

### Single catchment

The single catchment view mode is designed to plot all reaches within a given catchment.

1. Navigate to the catchment that you wish to visualise data for.
2. Select the Single catchment option under the Select view mode and then click on a reach within your catchment of interest. Note that you may need to zoom in and Update map to be able to view a reach for clicking first. The map will zoom to the scale of the catchment and map the data. This may take a few seconds for large catchments, so please be patient. All stream orders will be plotted under this setting.

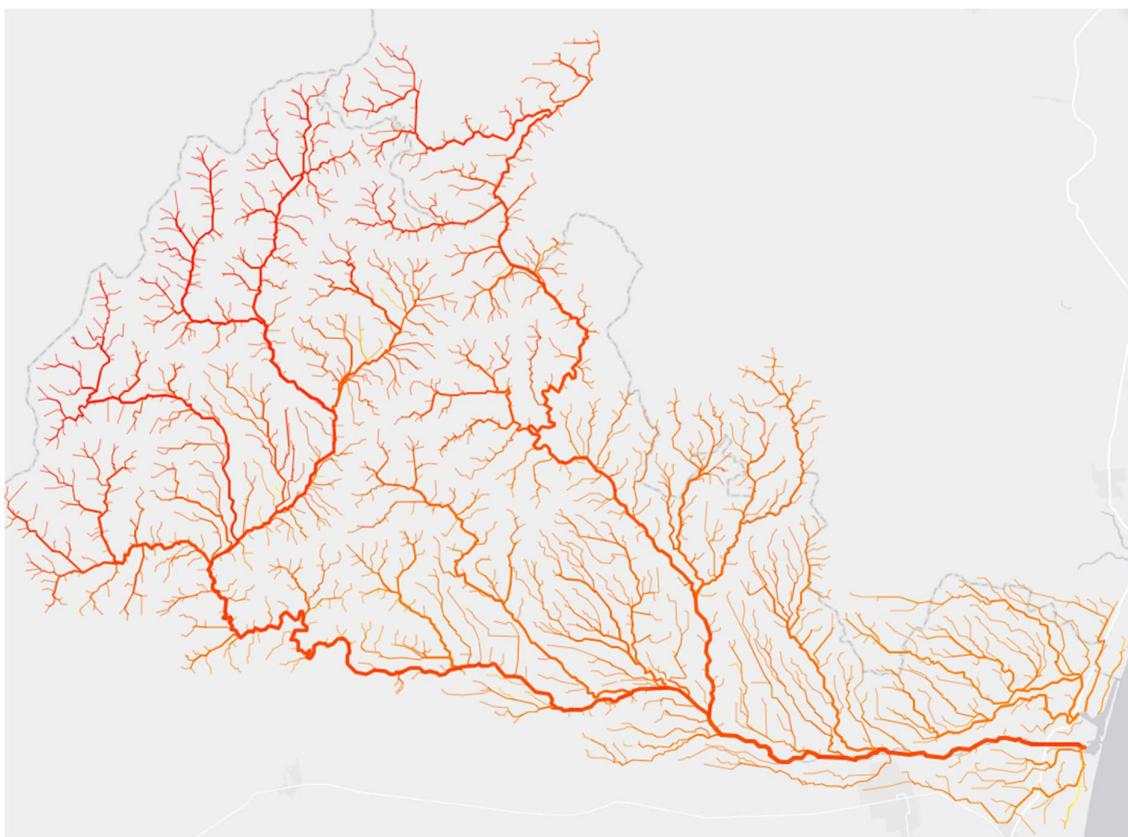

## Download data from NZ River Maps

NZ River Maps offers the option of downloading data for use in other applications under the [Download data](#) tab. The data provided in NZ River Maps is made available to download free of charge to allow you to use it for your own research. All data unless specifically stated is licensed under a Creative Commons Attribution 3.0 New Zealand License and must be attributed back to its original creator. We ask that you also acknowledge the use of NZ River Maps using the suggested citation.

Whitehead, A.L., Booker, D.J. (2020). NZ River Maps: An interactive online tool for mapping predicted freshwater variables across New Zealand. NIWA, Christchurch.

<https://shiny.niwa.co.nz/nzrivermaps/>

To download data:

1. Select your desired metrics. All predictions within a selected metric will be added shown in the table below and will be added to file for downloading.
2. Choose the desired spatial scale for the download. Visible on map will only download data for those reaches currently shown on the map. You can alter the map view using Select view mode on the Map options tab.
3. Click the Download data button to download a csv file of the selected data.
4. Click the Download metadata button to get an html file with information about the downloaded data, including units and the original data source.

The data is provided as a .csv file. If you wish to use this data to make your own maps, then you will need to combine it in a Geographic Information System with the New Zealand digital river network

which is available from the NIWA website (<https://niwa.co.nz/freshwater-and-estuaries/management-tools/river-environment-classification-0>). The joining column in the two datasets is labelled *nzsegment*.

## Comparison with point measurements of river water isotopes

Table 1 provides site information for National River Water Quality Network sites from which stable isotope data has been collected since 2017. These isotope data are stored online through the IAEA GNIR programme. It can be downloaded from the WISER database at <https://nucleus.iaea.org/wiser>

These data can be compared to modelled isotope values and geographical predictor information by combining it with New Zealand digital river network and NZ River Maps data using the *nzsegment* joining column.

**Table 1. Site information for NRWQN isotope sampling sites.**

| Site Code | river       | Catch. Area km2 | Highest Catch. Elev (m) | Site Elev (m) | lat      | long     | nzsegment |
|-----------|-------------|-----------------|-------------------------|---------------|----------|----------|-----------|
| AK1       | Hoteo       | 270             | 107                     | 15            | -36.3862 | 174.5112 | 2001653   |
| AK2       | Rangitopuni | 82              | 228                     | 10            | -36.7349 | 174.6182 | 2004545   |
| AX1       | Clutha      | 4453            | 973                     | 305           | -44.7328 | 169.2802 | 14014867  |
| AX2       | Kawarau     | 4302            | 1043                    | 305           | -45.0093 | 168.8785 | 14027448  |
| AX3       | Shotover    | 1079            | 1200                    | 320           | -44.9918 | 168.7163 | 14026862  |
| AX4       | Clutha      | 16548           | 902                     | 91            | -45.6632 | 169.4057 | 14055045  |
| CH1       | Hurunui     | 1060            | 976                     | 442           | -42.7922 | 172.543  | 13020391  |
| CH2       | Hurunui     | 2525            | 648                     | 60            | -42.902  | 173.1009 | 13023957  |
| CH3       | Waimakariri | 2387            | 1034                    | 244           | -43.3621 | 172.0557 | 13040507  |
| CH4       | Waimakariri | 3076            | 854                     | 76            | -43.423  | 172.634  | 13042388  |
| DN2       | Sutton Stm  | 151             | 672                     | 220           | -45.5979 | 170.094  | 14052240  |
| DN4       | Clutha      | 20582           | 790                     | 9             | -46.2384 | 169.746  | 14070057  |
| DN5       | Mataura     | 5139            | 470                     | 15            | -46.3877 | 168.7914 | 15059190  |
| DN7       | Oreti       | 1139            | 694                     | 220           | -45.7186 | 168.4308 | 15033324  |
| GS1       | Waipaoa     | 1571            | 385                     | 55            | -38.4684 | 177.8777 | 5010343   |
| GS2       | Waikohu     | 30.5            | 722                     | 457           | -38.4172 | 177.5601 | 5009160   |
| GS3       | Motu        | 293             | 622                     | 425           | -38.2024 | 177.6195 | 4016696   |
| GS4       | Motu        | 1376            | 607                     | 11            | -37.8616 | 177.636  | 4005116   |
| GY1       | Buller      | 6309            | 736                     | 15            | -41.8344 | 171.7013 | 12012463  |
| GY2       | Grey        | 3827            | 485                     | 20            | -42.4531 | 171.2992 | 12028095  |
| GY3       | Grey        | 642             | 774                     | 171           | -42.3616 | 171.7842 | 12025991  |
| GY4       | Haast       | 1027            | 1009                    | 53            | -43.9445 | 169.2987 | 12052272  |
| HM1       | Waipa       | 304             | 413                     | 80            | -38.2692 | 175.3501 | 3029370   |
| HM2       | Waipa       | 2822            | 201                     | 10            | -37.7992 | 175.1492 | 3017829   |
| HM6       | Ohinemuri   | 305             | 248                     | 10            | -37.417  | 175.7155 | 3010506   |
| HV2       | Tukituki    | 2438            | 342                     | 26            | -39.7164 | 176.9285 | 8026822   |
| HV3       | Ngaruroro   | 2001            | 663                     | 2             | -39.5879 | 176.8877 | 8024658   |

|            |             |       |      |     |          |          |          |
|------------|-------------|-------|------|-----|----------|----------|----------|
| <b>HV4</b> | Ngaruroro   | 384   | 1108 | 488 | -39.3803 | 176.3314 | 8021350  |
| <b>HV6</b> | Mohaka      | 1040  | 820  | 320 | -39.1823 | 176.6343 | 8017355  |
| <b>NN1</b> | Motueka     | 1750  | 613  | 76  | -41.2581 | 172.8223 | 10010534 |
| <b>NN2</b> | Motueka     | 166   | 1049 | 376 | -41.6336 | 172.9121 | 10022270 |
| <b>NN3</b> | Wairau      | 521   | 1422 | 655 | -41.8943 | 172.921  | 11029639 |
| <b>NN5</b> | Buller      | 1404  | 888  | 183 | -41.7664 | 172.3877 | 12010223 |
| <b>RO1</b> | Tarawera    | 414   | 455  | 320 | -38.1817 | 176.5049 | 4014379  |
| <b>RO2</b> | Tarawera    | 914   | 374  | 6   | -37.9309 | 176.7715 | 4005289  |
| <b>RO3</b> | Rangitaiki  | 1144  | 599  | 185 | -38.4572 | 176.6988 | 4022486  |
| <b>RO4</b> | Whirinaki   | 509   | 528  | 205 | -38.4799 | 176.7468 | 4022892  |
| <b>RO5</b> | Rangitaiki  | 2818  | 482  | 3   | -38.0412 | 176.8006 | 4009262  |
| <b>RO6</b> | Waikato     | 3305  | 655  | 349 | -38.6637 | 176.0815 | 3043220  |
| <b>TK1</b> | Opihi       | 2373  | 542  | 4   | -44.2754 | 171.3372 | 13064842 |
| <b>TK2</b> | Opihi       | 406   | 627  | 180 | -44.1698 | 170.9402 | 13063543 |
| <b>TK3</b> | Opuha       | 458   | 1020 | 238 | -44.0828 | 170.9779 | 13062111 |
| <b>TK4</b> | Waitaki     | 9741  | 1047 | 250 | -44.7063 | 170.4539 | 13520779 |
| <b>TK5</b> | Hakataramea | 896   | 695  | 198 | -44.7299 | 170.488  | 13521044 |
| <b>TK6</b> | Waitaki     | 11909 | 956  | 5   | -44.9315 | 171.1009 | 13524234 |
| <b>TU1</b> | Whanganui   | 2139  | 553  | 131 | -38.9441 | 175.1881 | 7006225  |
| <b>TU2</b> | Tongariro   | 786   | 1005 | 363 | -38.9972 | 175.8137 | 3048532  |
| <b>WA1</b> | Waitara     | 1114  | 257  | 15  | -39.0561 | 174.2586 | 6002601  |
| <b>WA2</b> | Manganui    | 19    | 725  | 320 | -39.2828 | 174.2547 | 6006892  |
| <b>WA4</b> | Whanganui   | 6567  | 423  | 18  | -39.7753 | 175.1469 | 7026243  |
| <b>WA5</b> | Rangitikei  | 2689  | 864  | 518 | -39.8131 | 175.8077 | 7027408  |
| <b>WA7</b> | Manawatu    | 716   | 371  | 152 | -40.2411 | 176.116  | 7037199  |
| <b>WH1</b> | Waipapa     | 122   | 237  | 30  | -35.2771 | 173.6876 | 1007423  |
| <b>WH2</b> | Waitangi    | 307   | 151  | 10  | -35.2793 | 174.0473 | 1007625  |
| <b>WH3</b> | Mangakahia  | 809   | 231  | 21  | -35.7393 | 174.0507 | 1018663  |
| <b>WH4</b> | Wairua      | 546   | 159  | 91  | -35.6513 | 174.1538 | 1016617  |
| <b>WN2</b> | Hutt        | 87    | 576  | 200 | -41.0533 | 175.1911 | 9008427  |
| <b>WN5</b> | Ruamahanga  | 78    | 829  | 268 | -40.7609 | 175.6037 | 9000872  |
