# Supplementary material for: A method for predicting hydrogen and oxygen isotope distributions across a region's river network using reach-scale environmental attributes
Source: Copernicus journal article supplement (doi:10.5194/hess-26-4933-2022), 2022-10-07
Supplement: Supplementary file 2 [file hess-26-4933-2022-supplement.zip]

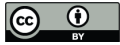

## *Supplement of*

# **A method for predicting hydrogen and oxygen isotope distributions across a region's river network using reach-scale environmental attributes**

**Bruce D. Dudley et al.**

*Correspondence to:* Bruce D. Dudley (bruce.dudley@niwa.co.nz)

- hess-26-4933-2022-supplement-title-page.pdf
- Dudley et al supplement
  - Dudley et al S2
    - \* d18O\_mo\_rec2\_5.tfw
    - \* d18O\_mo\_rec2\_5.tif
    - \* d18O\_precip.tfw
    - \* d18O\_precip.tif
    - \* d2H\_mo\_rec2\_5.tfw
    - \* d2H\_mo\_rec2\_5.tif
    - \* d2H\_precip.tfw
    - \* d2H\_precip.tif
  - Supplementary File S3.pdf
  - Supplementary file 1 - validation.dataset.xlsx

The copyright of individual parts of the supplement might differ from the article licence.
